# Supplementary material
Source: publisher figshare collection journal article supplement (https://tandf.figshare.com/ndownloader/files/14565497)
Supplement: Supplementary file 1 [file 14565497]

**Supplementary Material**

| **Cognitive domain** | **Neuropsychological test** |
| --- | --- |
| **Effort** | Digit span; Test of Memory Malingering (TOMM); inconsistency on testing the same cognitive domain; tester’s subjective judgement |
| **Verbal IQ** | Wechsler Adult Intelligence Scale-III (WAIS-III) |
| **Non-verbal IQ** | Wechsler Adult Intelligence Scale-III (WAIS-III) |
| **Visual memory** | Recognition Memory TestTM (RMTTM) |
| **Verbal memory** | Recognition Memory TestTM (RMTTM) |
| **Executive function** | The Stroop Color and Word Test (SCWT); Trail Making Test (TMT) Parts A and B; Brixton Spatial Anticipation Test |
| **Processing speed** | Symbol Digit Modalities Test (SDMT) |
| **Visuospatial** | Visual Object and Space Perception Battery (VOSP) |
| **Nominal** | Oldfield naming test |
| **Supplementary table 1. Neuropsychological tests used to assess each cognitive domain.** | |

| **Cognitive domain** | **Overall FCD patients (N=34)*** | **FCD patients with co-morbid depression (N=17)*** | **FCD patients without co-morbid depression (N=17)*** |
| --- | --- | --- | --- |
| **Suboptimal effort**  **No. (%)** | 12 (35) | 5 (29) | 7 (41) |
| **NART, No. (%)** | **N=19** | **N=9** | **N=10** |
| Superior | 3 (16) | 1 (11) | 2 (20) |
| Normal | 15 (79) | 7 (77) | 8 (80) |
| Inferior | 1 (5) | 1 (11) | 0 (0) |
| **Verbal IQ, No. (%)** | **N=25** | **N=15** | **N=10** |
| Superior | 4 (16) | 3 (20) | 1 (10) |
| Normal | 13 (52) | 6 (40) | 7 (70) |
| Inferior | 8 (32) | 6 (40) | 2 (20) |
| **Non-verbal IQ, No. (%)** | **N=30** | **N=17** | **N=13** |
| Superior | 3 (10) | 2 (12) | 1 (8) |
| Normal | 14 (47) | 6 (35) | 8 (62) |
| Inferior | 13 (43) | 9 (53) | 4 (31) |
| **Visual Memory, No. (%)** | **N=34** | **N=17** | **N=17** |
| Moderately impaired | 13 (38) | 7 (41) | 6 (35) |
| Severely impaired | 6 (18) | 2 (12) | 4 (24) |
| **Verbal Memory, No. (%)** | **N=34** | **N=17** | **N=17** |
| Moderately impaired | 12 (35) | 11 (65) | 1 (6) |
| Severely impaired | 5 (15) | 1 (6) | 4 (24) |
| **Executive Function, No. (%)** | **N=33** | **N=17** | **N=16** |
| Moderately impaired | 8 (24) | 5 (29) | 3 (19) |
| Severely impaired | 9 (27) | 5 (29) | 4 (25) |
| **Processing speed, No. (%)** | **N=33** | **N=17** | **N=16** |
| Moderately impaired | 9 (27) | 8 (47) | 1 (6) |
| Severely impaired | 12 (36) | 4 (24) | 8 (50) |
| **Visuospatial, No. (%)** | **N=32** | **N=16** | **N=16** |
| Impaired | 9 (28) | 6 (38) | 3 (19) |
| **Nominal, No. (%)** | **N=32** | **N=15** | **N=17** |
| Moderately impaired | 8 (25) | 6 (40) | 2 (12) |
| Severely impaired | 1 (3) | 1 (3) | 0 (0) |
| ***unless stated; NART, National Adult Reading Test.** | | | |
| **Supplementary table 2. Neuropsychometric profiles including those of patients who demonstrated suboptimal effort/invalid performance.** | | | |

| **Co-morbid depression and/or anxiety** | **NART** | **Verbal IQ** | **Non-verbal IQ** | **Visual Memory** | **Verbal memory** | **Executive Function** | **Processing Speed** | **Visuo-spatial** | **Nominal** | **Effort** |
| --- | --- | --- | --- | --- | --- | --- | --- | --- | --- | --- |
| **Yes** |  | **↔** | **↓** | **↓** | **↓** | **↓** | **↓** | **↓** | **↓** |  |
| **Yes** | **↑** | **↑** | **↑** | **↑** | **↑** | **↑** | **↑** | **↔** |  |  |
| **Yes** | **↔** | **↔** | **↔** | **↔** | **↓** | **↓** | **↔** | **↔** | **↓** |  |
| **Yes** |  | **↓** | **↓** | **↓** | **↓** | **↓** | **↓** | **↓** | **↓** | **↓** |
| **Yes** | **↔** | **↓** | **↓** | **↔** | **↓** | **↓** | **↓** | **↓** | **↔** | **↓** |
| **Yes** | **↔** | **↓** | **↓** | **↓↓** | **↓↓** | **↓↓** | **↓** | **↔** | **↓** |  |
| **Yes** | **↔** | **↔** | **↔** | **↓** | **↑↑** | **↔** | **↔** | **↔** | **↔** | **↓** |
| **Yes** | **↔** |  | **↓** |  | **↓** | **↓↓** | **↓** | **↓** | **↔** |  |
| **Yes** | **↔** | **↔** | **↔** | **↔** | **↔** | **↔** | **↔** | **↔** | **↔** |  |
| **Yes** |  | **↔** | **↔** | **↑** | **↓** | **↔** | **↔** | **↔** | **↑** |  |
| **Yes** |  | **↓** | **↓** | **↓** | **↓** | **↓** | **↓↓** | **↓** | **↔** | **↓** |
| **Yes** |  | **↑** | **↔** | **↑** | **↔** | **↔** | **↔** | **↔** |  |  |
| **Yes** |  |  | **↓** | **↓↓** | **↓** | **↔** | **↓** | **↓** | **↓** |  |
| **Yes** | **↓** | **↓** | **↓** | **↓** | **↓** | **↓↓** | **↓** |  | **↓** | **↓** |
| **Yes** |  | **↑** | **↑** | **↔** | **↑** | **↑** | **↑↑** | **↑** | **↔** |  |
| **Yes** |  | **↔** | **↔** | **↓** | **↓** | **↓↓** | **↓↓** | **↔** | **↔** |  |
| **Yes** | **↔** | **↓** | **↓** | **↓** | **↓** | **↓↓** | **↓↓** | **↔** | **↓↓** |  |
| **No** | **↔** | **↔** | **↓** | **↑↑** | **↔** | **↑** | **↔** | **↔** | **↔** |  |
| **No** |  |  | **↔** | **↓** | **↑** | **↔** | **↓↓** | **↔** | **↔** | **↓** |
| **No** |  | **↔** | **↔** | **↔** | **↑** | **↓** | **↓** | **↔** | **↔** |  |
| **No** |  |  | **↓** | **↓** | **↔** | **↔** | **↓** | **↔** | **↔** |  |
| **No** | **↔** | **↔** | **↔** | **↓** | **↑** | **↑** | **↔** | **↔** | **↑** |  |
| **No** | **↔** | **↔** | **↓** | **↔** | **↓** | **↓** | **↓** | **↔** | **↔** |  |
| **No** | **↔** | **↓** | **↓** | **↓↓** | **↓↓** | **↓↓** | **↓↓** | **↔** | **↔** | **↓** |
| **No** |  |  | **↔** | **↔** | **↓↓** | **↔** | **↔** | **↔** | **↔** |  |
| **No** | **↔** | **↔** | **↔** | **↓↓** | **↓↓** | **↓↓** | **↓↓** | **↔** | **↑** | **↓** |
| **No** | **↑** | **↑** | **↑** | **↔** | **↔** | **↑↑** | **↑↑** | **↔** | **↑** |  |
| **No** | **↔** | **↓** | **↔** | **↓↓** | **↓↓** | **↓↓** | **↓↓** | **↔** | **↔** | **↓** |
| **No** | **↔** |  | **↔** | **↓↓** | **↓↓** | **↓↓** | **↓↓** | **↓** | **↓** | **↓** |
| **No** | **↑** | **↔** | **↓** | **↓↓** | **↔** | **↔** | **↓↓** | **↔** | **↔** |  |
| **No** |  |  |  | **↓↓** | **↓↓** |  |  |  | **↓** |  |
| **No** | **↔** | **↔** | **↔** | **↔** | **↔** | **↔** | **↔** | **↔** | **↔** |  |
| **No** |  | **↔** | **↔** | **↔** | **↔** | **↔** | **↓↓** | **↓** | **↔** | **↓** |
| **No** |  |  | **↓** | **↓** | **↓** | **↓** | **↓↓** | **↓** | **↔** | **↓** |
| | **↑↑= Superior; ↑=Above average; ↔=Normal; ↓= below average; ↓↓= significantly impaired; NART, National Adult Reading Test. Red indicates suboptimal effort.** | | --- | | | | | | | | | | | |
| **Supplementary table 3. Neuropsychometric profiles of all patients.** | | | | | | | | | | |
